# Supplementary material for: Associations of Serum Folate and Holotranscobalamin with Cardiometabolic Risk Factors in Rural and Urban Cameroon
Source: MDPI journal article supplement (doi:10.3390/nu14010178), 2021-12-30
Supplement: s1 [file s1]

Supplementary material

Table S1: Socio-demographic characteristics of the study population stratified by sex and urban/rural residence, Cameroon study (n=578)

| Characteristics                       | Women (n=370)     |                  |         | Men (n=208)       |                  |         |
|---------------------------------------|-------------------|------------------|---------|-------------------|------------------|---------|
|                                       | Rural (n=172)     | Urban (n=198)    | p-value | Rural (n=97)      | Urban (n=111)    | p-value |
| Age (years)                           | 39.9± 8.1         | 38.6± 8.8        | 0.137   | 37.3±8.3          | 36.2±8.9         | 0.373   |
| Education (years)                     | 8.0±4.2           | 11.9±5.2         | <0.001  | 8.9±4.5           | 13.3±5.2         | <0.001  |
| Education level, n (%)<br>(completed) |                   |                  |         |                   |                  |         |
| < Primary education                   | 53(30.8)          | 24(12.1)         | < 0.001 | 22(22.9)          | 4(3.6)           | < 0.001 |
| Primary education                     | 92(53.5)          | 74(37.4)         |         | 55(57.3)          | 32(28.8)         |         |
| Secondary and high school             | 24(14.0)          | 66(33.3)         |         | 15(15.6)          | 41(36.9)         |         |
| University                            | 3(1.7)            | 34(17.2)         |         | 4(4.2)            | 34(30.6)         |         |
| Alcohol intake, n (%)                 |                   |                  |         |                   |                  |         |
| Never                                 | 26(15.1)          | 24(12.1)         | 0.485   | 10(10.3)          | 06(5.4)          | 0.104   |
| Past                                  | 17(9.9)           | 26(13.1)         |         | 03(3.1)           | 10(9.0)          |         |
| Current                               | 129(75.0)         | 148(74.8)        |         | 84(86.6)          | 95(85.6)         |         |
| Smoking status, n (%):                |                   |                  |         |                   |                  |         |
| Never                                 | 160(93.0)         | 181(91.4)        | 0.821   | 56(57.7)          | 52(46.9)         | 0.293   |
| Past smoker                           | 11(6.4)           | 16(8.1)          |         | 21(21.7)          | 30(27.0)         |         |
| Current smoker                        | 1(0.6)            | 1(0.5)           |         | 20(20.6)          | 29(26.1)         |         |
| Fruit (times/week)                    | 3(2-6)            | 2(1-5)           | 0.078   | 2(1-6)            | 2(1-3)           | 0.016   |
| Vegetables (times/week)               | 6(3-9)            | 4(2-6)           | <0.0001 | 4(2-6)            | 3(2-6)           | 0.189   |
| PAEE (KJ/Kg/day)                      | 54.3±21.1         | 38.4±16.6        | <0.0001 | 65.7±26.2         | 52.1±22.5        | 0.0001  |
| Sedentary time (min/day)              | 925.1±143.7       | 1016.4±137.3     | <0.0001 | 880.9± 154.1      | 960.9±149.4      | 0.0005  |
| LPA time (min/day)                    | 379.01±95.7       | 333.1±104.1      | 0.0001  | 414.3±98.7        | 366.4±111.7      | 0.003   |
| MVPA time (min/day)                   | 116.2(69.6-201.6) | 75.3(47.5-113.2) | <0.0001 | 132.7(61.8-202.1) | 94.2(54.7-148.3) | 0.038   |
| GPAQ PAEE (KJ/Kg/day)                 | 82.5(7.2-178.6)   | 7.6(3.4-53.8)    | <0.0001 | 38.5(3.2-141.1)   | 18.8(3.5-74.4)   | 0.177   |
| GPAQ work (MET-min/week)              | 7480(0-16800)     | 0(0-4800)        | <0.0001 | 2880(0-12960)     | 0(0-6000)        | 0.027   |

|                             |                |               |         |               |               |       |
|-----------------------------|----------------|---------------|---------|---------------|---------------|-------|
| GPAQ leisure (MET-min/week) | 0(0-0)         | 0(0-0)        |         | 0(0-0)        | 0(0-0)        |       |
| GPAQ travel (MET-min/week)  | 1680(560-3360) | 720(300-1680) | <0.0001 | 840(420-5040) | 840(280-2520) | 0.276 |

Results are presented as arithmetic mean [or median (25<sup>th</sup>-75<sup>th</sup> percentile) for non-normally distributed variables] or n (%). p-values are from a t-test for normally distributed continuous variables (or Mann Whitney test for non-normally distributed variables) and from a chi-squared test for categorical variables.

PAEE, physical activity energy expenditure; LPA, light physical activity; MVPA, moderate to vigorous physical activity; GPAQ, global physical activity questionnaire

Table S2: Metabolic characteristics of the study population stratified by sex and urban/rural residence, Cameroon study (n=578)

| Characteristics                       | Women (n=370)   |                 | p-value | Men (n=208)     |                 | p-value |
|---------------------------------------|-----------------|-----------------|---------|-----------------|-----------------|---------|
|                                       | Rural (n=172)   | Urban (n=198)   |         | Rural (n=97)    | Urban (n=111)   |         |
| Serum folate (nmol/L)                 | 14.4(9.29-24.3) | 11.4(8.31-16.1) | 0.0006  | 18.1(11.3-27.1) | 10.7(7.09-15.3) | <0.0001 |
| Serum folate including meFox (nmol/L) | 18.0(12.8-30.1) | 14.9(10.8-21.0) | 0.0002  | 25.1(14.5-35.1) | 13.6(8.89-20.3) | <0.0001 |
| meFox (nmol/L)                        | 3.96(2.79-5.77) | 2.96(1.95-4.98) | 0.0001  | 5.54(3.18-8.97) | 2.84(1.98-4.85) | <0.0001 |
| Folate deficiency, n (%)              | 51(29.7)        | 82(41.4)        | 0.019   | 19(19.6)        | 52(46.9)        | <0.001  |
| HoloTC (pmol/L)                       | 69.7±32.1       | 80.4±34.6       | 0.0028  | 69.9±34.5       | 78.7±35.9       | 0.085   |
| HoloTC deficiency (n=547), n (%)      | 49 (29)         | 35(18.9)        | 0.026   | 33(36.3)        | 28(27.5)        | 0.189   |
| BMI (kg/m <sup>2</sup> )              | 24.9±4.9        | 29.1±5.5        | <0.0001 | 23.1±3.3        | 25.4±4.1        | <0.0001 |
| BMI categories, n (%)                 |                 |                 |         |                 |                 |         |
| <25                                   | 103(59.9)       | 50(25.3)        | <0.001  | 72(54.2)        | 65(58.6)        | 0.03    |
| 25-29.9                               | 41(23.8)        | 56(28.3)        |         | 22(22.7)        | 35(31.5)        |         |
| ≥ 30                                  | 28(16.3)        | 92(46.5)        |         | 03(3.1)         | 11(9.9)         |         |
| Waist circumference (cm)              | 85.3±11.4       | 94.1±12.9       | <0.0001 | 82.9±8.0        | 89.2±11.3       | <0.0001 |
| Central obesity, n (%)                | 114 (66.3)      | 167(84.3)       | <0.0001 | 9(9.3)          | 30(27.0)        | 0.001   |
| Waist to hip ratio                    | 0.84±0.08       | 0.85±0.07       | 0.89    | 0.86±0.05       | 0.87±0.06       | 0.094   |
| Body fat (%)                          | 30.3±8.3        | 37.4±7.59       | <0.0001 | 15.9±5.5        | 20.1±7.0        | <0.0001 |
| Systolic blood pressure (mmHg)        | 117 ± 19        | 124 ± 22        | 0.003   | 121 ± 15        | 130 ± 23        | 0.0007  |
| Diastolic blood pressure (mmHg)       | 74±12           | 80 ± 14         | 0.0001  | 72 ± 12         | 78 ± 15         | 0.003   |
| Fasting blood glucose (mmol/L)        | 4.82±1.39       | 4.86±1.08       | 0.752   | 4.68±1.49       | 4.65±1.56       | 0.89    |
| 2-h blood glucose (mmol/L)            | 6.23±1.74       | 6.61±1.93       | 0.054   | 5.91±1.55       | 6.07±1.99       | 0.54    |
| Total cholesterol (mmol/L)            | 3.85±0.95       | 4.02±0.99       | 0.099   | 3.64±0.97       | 3.74±0.95       | 0.442   |

|                          |                 |                 |        |                 |                 |       |
|--------------------------|-----------------|-----------------|--------|-----------------|-----------------|-------|
| LDL cholesterol (mmol/L) | 2.26±0.83       | 2.36±0.85       | 0.244  | 2.08±0.80       | 2.13±0.83       | 0.664 |
| HDL cholesterol (mmol/L) | 1.19±0.33       | 1.26±0.32       | 0.027  | 1.19±0.36       | 1.23±0.31       | 0.437 |
| Triglycerides (mmol/L)   | 0.78(0.63-1.01) | 0.71(0.57-0.91) | 0.03   | 0.71(0.58-0.93) | 0.73(0.55-0.97) | 0.933 |
| Fasting insulin (pmol/L) | 22.3(14.2-39.1) | 24.5(13.8-37.7) | 0.799  | 14.8(6.5-27.4)  | 17.3(8.1-28.9)  | 0.391 |
| CRP (mg/L)               | 5.26(2.61-8.41) | 4.6(2.64-8.33)  | 0.699  | 5.56(2.58-9.89) | 4.22(2.12-8.15) | 0.099 |
| Adiponectin (µg/ml)      | 6.85(4.63-9.34) | 5.88(3.72-7.96) | 0.0006 | 4.34(3.09-6.34) | 4.40(3.07-5.87) | 0.946 |
| HOMA-IR index            | 0.77(0.47-1.47) | 0.87(0.49-1.32) | 0.706  | 0.49(0.20-0.86) | 0.60(0.23-1.08) | 0.365 |
| Metabolic syndrome score | -0.31±2.25      | 0.35±2.67       | 0.013  | -0.58±2.32      | 0.38±2.83       | 0.009 |

Results are presented as arithmetic mean [or median (25<sup>th</sup>-75<sup>th</sup> percentile) for non-normally distributed variables] or n (%). p-values are from a t-test for normally distributed continuous variables (or Mann Whitney test for non-normally distributed variables) and from a chi-squared test for categorical variables.

meFox, oxidation product of 5-methyltetrahydrofolate (pyrazino-s-triazine derivative); physical activity energy expenditure; HoloTC, holotranscobalamin; BMI, body mass index; LDL, low density lipoproteins; HDL, high density lipoproteins; CRP, C-reactive protein; HOMA-IR, homeostatic model assessment of insulin resistance

Table S3: Characteristics of participants with vitamin B12 and folate deficiency, Cameroon study (n=547)

| Characteristics                | Combined deficiency, n=37<br>(6.8%) | Others, n=510 (93.2%) | p-value |
|--------------------------------|-------------------------------------|-----------------------|---------|
| Age (years)                    | 36.3± 9.1                           | 38.4 ± 8.5            | 0.15    |
| Sex, n(%)                      |                                     |                       |         |
| Male                           | 16(43.2)                            | 177(34.7)             | 0.29    |
| Education level, n(%)          |                                     |                       |         |
| < primary education            | 5(13.5)                             | 95(18.7)              | 0.814   |
| Primary                        | 16(43.2)                            | 225(44.2)             |         |
| Secondary and high school      | 10(27.1)                            | 125(24.5)             |         |
| University                     | 6(16.2)                             | 64(12.6)              |         |
| Site, n(%)                     |                                     |                       |         |
| Urban                          | 27(73.0)                            | 260(51.0)             | 0.01    |
| Alcohol consumption (%):       |                                     |                       |         |
| Never                          | 3(8.1)                              | 57(11.2)              | 0.850   |
| Past                           | 4(10.8)                             | 50(9.8)               |         |
| Current                        | 30(81.1)                            | 403(79.0)             |         |
| Smoking status, n(%):          |                                     |                       |         |
| Never                          | 26(70.3)                            | 396(77.7)             | 0.572   |
| Past                           | 7(18.9)                             | 69(13.5)              |         |
| Current                        | 4(10.8)                             | 45(8.8)               |         |
| PAEE (KJ/Kg/day)               | 50 ± 18.1                           | 50.9 ± 23.4           | 0.417   |
| GPAQ PAEE (KJ/Kg/day)          | 6.5(3.5-75.3)                       | 25.5(4.2-128.9)       | 0.166   |
| Fruits (times/week)            | 3(1-6)                              | 2(1-5)                | 0.539   |
| Vegetables (times/week)        | 4(2-8)                              | 4(2-7)                | 0.914   |
| BMI (Kg/m <sup>2</sup> )       | 26.1 ± 4.8                          | 26.1 ± 5.3            | 0.97    |
| Waist (cm)                     | 89.6 ± 11.3                         | 88.5 ± 12.2           | 0.617   |
| Systolic blood pressure (mmHg) | 123 ± 25                            | 122 ± 20              | 0.786   |

|                                 |                 |                 |       |
|---------------------------------|-----------------|-----------------|-------|
| Diastolic blood pressure (mmHg) | 78 ± 16         | 76 ± 13         | 0.529 |
| Fasting blood glucose (mmol/L)  | 4.9 ± 1.3       | 4.8 ± 1.4       | 0.67  |
| 2-h blood glucose (mmol/L)      | 6.15 ± 1.46     | 6.28 ± 1.87     | 0.682 |
| HOMA-IR                         | 0.45(0.87-1.41) | 0.71(0.38-1.23) | 0.27  |
| Metabolic syndrome z-score      | 0.18 ± 2.7      | -0.007 ± 2.5    | 0.672 |

Results are presented as arithmetic mean [or median (25<sup>th</sup>-75<sup>th</sup> percentile) for non-normally distributed variables] or n (%). p-values are from a t-test for normally distributed continuous variables (or Mann Whitney test for non-normally distributed variables) and from a chi-squared test for categorical variables.

Vitamin B12 deficiency was defined as holotranscobalamin less than 50 pmol/L and folate deficiency as serum folate less than 10 nmol/L

PAEE, physical activity energy expenditure; GPAQ, global physical activity questionnaire, BMI, body mass index, HOMA-IR, homeostatic model assessment of insulin resistance

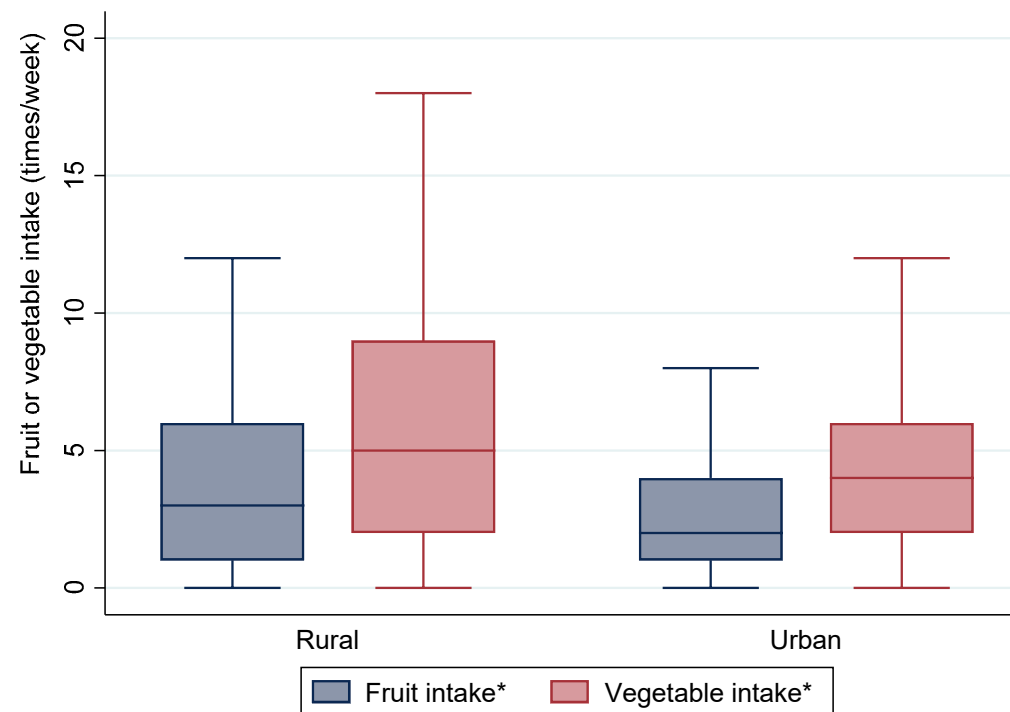

Figure S1: Distribution of self-reported fruit and vegetables intake in rural and urban residents (Cameroon study, n=578)

Median (interquartile range)

\* $P < 0.05$  for difference in self-reported intake between participants living in rural and urban areas using a Mann Whitney test

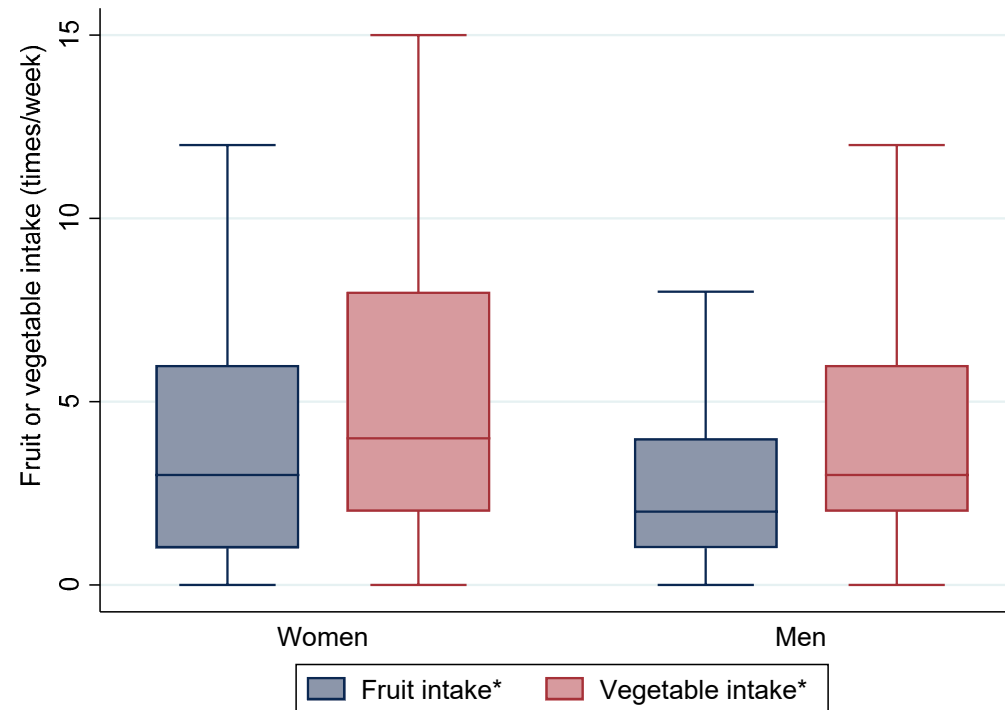

Figure S2: Distribution of self-reported fruit and vegetables intake in women and men (Cameroon study, n=578)

Median (interquartile range)

\* $P < 0.05$  for difference in self-reported intake between women and men using a Mann Whitney test



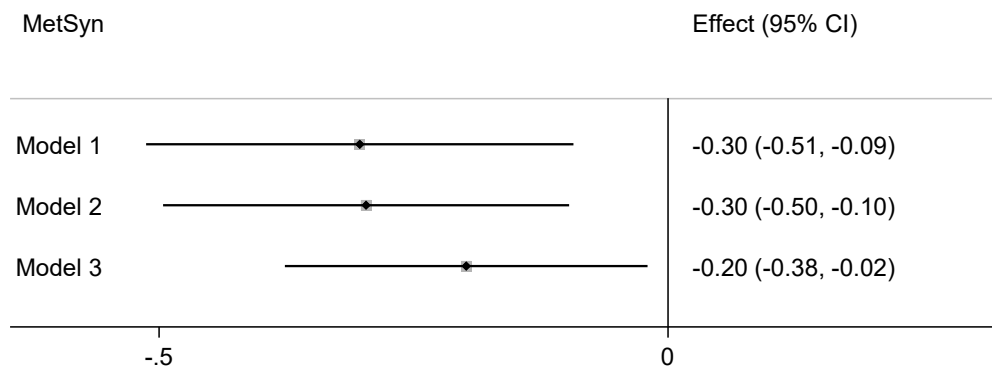

Figure S3: Association between serum folate and metabolic syndrome score (Cameroon study, n=520).

MetSyn, metabolic syndrome score; effect ( $\beta$ -coefficient), difference in metabolic syndrome score per 1SD (10.8 nmol/L) of serum folate; 95% CI: 95% confidence interval

Model 1: Unadjusted

Model 2: Adjusted for age, sex, level of education, smoking, alcohol intake, residential site

Model 3: model 2 + body mass index + objectively measured physical activity

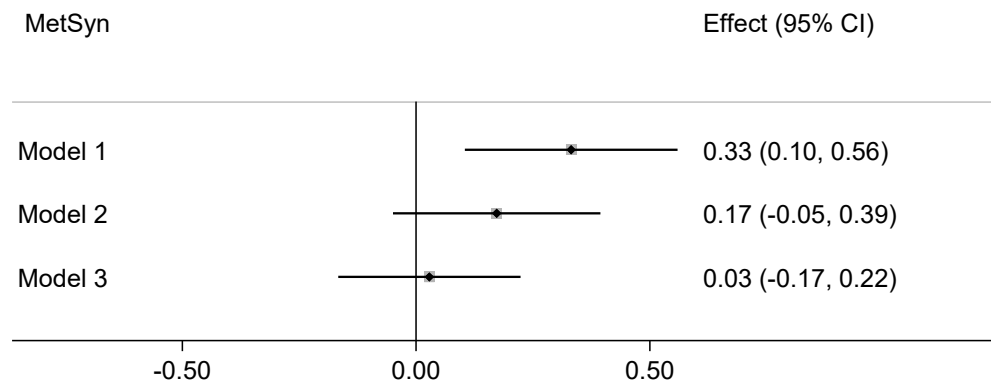

Figure S4: Association between serum holotranscobalamin and metabolic syndrome score (Cameroon study, n=491)

MetSyn, metabolic syndrome score; effect ( $\beta$ -coefficient), difference in metabolic syndrome score per 1SD (34.3 pmol/L) of serum holotranscobalamin; 95% CI: 95% confidence interval

Model 1: Unadjusted

Model 2: Adjusted for age, sex, level of education, smoking, alcohol intake, residential site

Model 3: model 2 + body mass index + objectively measured physical activity
